# Supplementary material
Source: PubMed Central journal article supplement (PMC5852512)
Supplement: cvx198_online_data_supplement.pdf [file cvx198_online_data_supplement.pdf]

## **ONLINE DATA SUPPLEMENT**

### **METHODS**

#### **Treatments**

For experiments using steroid ligands, cells were grown in medium supplemented with 10% (HEK293 cells and fibroblasts) or 2% (PAECs) charcoal-stripped heat inactivated FBS. SPL (Sigma, St. Louis, MO) and EPL (Tocris, Minneapolis, MN) were solubilized in ethanol or sterile DMSO (Sigma) before dilution in medium supplemented with charcoal-stripped heat inactivated FBS. Recombinant human TNF $\alpha$  (Peprotech, Rocky Hill, NJ) was prepared in PBS with 0.1% BSA. PMA (Calbiochem, Billerica, MA) was solubilized in sterile DMSO before further dilution. MG132 (EMD Millipore, Bellerica, MA) was solubilized in ethanol before further dilution and cells were pre-treated with 10 $\mu$ M for 1h prior to MR antagonist or vehicle control treatment as indicated. Working concentrations of CHX were prepared in sterile DMSO from a 100mg/mL stock solution (Sigma) and cells were treated at a final concentration of 100 $\mu$ g/mL as indicated. Cells in each experiment were exposed to equivalent volumes of vehicle.

#### **DNA plasmid transfections**

For total cell lysates used for Western blots, 5x10<sup>5</sup> HEK293 cells were seeded in 35mm plates 48h prior to transfection. Cells were transiently transfected with 1 $\mu$ g of empty-vector (DDK-myc/pCMV6; Origene, Rockville, MD) plus 0.5 $\mu$ g of human MR-DDK-myc/pCMV6 (Origene), AR-DDK-myc/pCMV6 (Origene), GR-DDK-myc/pCMV6 (Origene), PR-DDK-myc/pCMV6 (Origene), or additional empty-vector using lipofectamine® 2000 (Life Technologies). For PXR and RXR $\gamma$ , 2x10<sup>5</sup> HEK293 cells/well were seeded in 12-well plates 48h prior to transfection. Cells were transiently transfected with 0.5 $\mu$ g of empty-vector plus 200ng of hPXR-DDK-

myc/pCMV6 (Origene), hRXR $\gamma$ -DDK-myc/pCMV6 (Origene), or additional empty-vector using lipofectamine® 2000. For co-expression, cells were transiently transfected with 300ng of empty-vector plus 200ng of hPXR-DDK-myc/pCMV6 and 200ng of hRXR $\gamma$ -DDK-myc/pCMV6. For XPB overexpression, cells were transiently transfected with 750ng of empty-vector (DDK-myc/pCMV6; Origene) plus 750ng of human XPB (*ERCC3*)/pCMV6-AC (Origene) or additional empty-vector. For luciferase reporter assays,  $1 \times 10^5$  HEK293 cells/well were seeded in 24-well plates 48h prior to transfection. Cells were transiently transfected as above with 100ng/well of MR, AR, GR, PR, PXR, RXR $\gamma$ , PXR+RXR $\gamma$ , XPB or empty-vector control plasmid along with 50ng of an internal control vector (pGL4.74/hRluc; Promega, Madison, WI). In addition, cells were simultaneously transfected with 100 ng of a destabilized luciferase reporter regulated by either NF- $\kappa$ B (pGL 4.32[luc2P/NF- $\kappa$ B-RE/Hygro]; Promega), or activator protein 1 (AP-1; pGL4.44[luc2P/AP-1-RE/Hygro]; Promega) as previously described.<sup>1</sup> Total amount of plasmid DNA per well was equal among experimental conditions using additional empty-vector control plasmid as necessary.

### **Western blotting**

Cells were lysed on ice with RIPA buffer (Life Technologies) supplemented with either complete mini-protease inhibitors (Roche, Nutley, NJ) or Halt™ Protease and Phosphatase Inhibitor Cocktail (Life Technologies). Lysates were cleared by centrifugation (20,000g for 15min at 4°C), resolved by SDS-PAGE and transferred to a nitrocellulose membrane using the iBlot® Dry Blotting System (Life Technologies). Blots were blocked with 5% ECL Primer blocking agent (GE Healthcare, Pittsburgh, PA) and then incubated overnight at 4°C with the following antibodies against MR (1:100, rMR1-18, 1D5),<sup>2</sup> AR (1:250, sc-816; Santa Cruz

Biotechnology, Inc.), GR (1:500, sc-1003; Santa Cruz Biotechnology, Inc.), PR (1:200, sc-538; Santa Cruz Biotechnology, Inc.), PXR (1:100, sc-48403; Santa Cruz Biotechnology, Inc.), RXR $\gamma$  (1:100, sc-365252; Santa Cruz Biotechnology, Inc.),  $\alpha$ -tubulin (1:200, sc-5286; Santa Cruz Biotechnology, Inc.), or COX2/PTGS2 (1:1000 160107; Cayman Chemical, Ann Arbor, MI). Staining for  $\beta$ -actin was done at room temperature for 1h with an HRP-conjugated anti- $\beta$ -actin antibody (1:50,000, A3854; Sigma). An N-terminal antibody was used for XPB detection in HEK293 cells, PAECs and fibroblasts (1:100, AF6349; R&D Systems, Minneapolis, MN). A C-terminal antibody was used for XPB detection in homogenized whole lung tissue (1:5000, sc-293X; Santa Cruz Biotechnology, Inc.). Blots were washed with 0.1% Tween-20 (Sigma) in PBS and then incubated with HRP-conjugated donkey anti-goat (705-035-147; Jackson ImmunoResearch Laboratories, Inc., West Grove, PA), goat anti-mouse antibody (sc-2055; Santa Cruz Biotechnology, Inc.), or goat anti-rabbit (sc-2004; Santa Cruz Biotechnology, Inc. or 111-035-003; Jackson ImmunoResearch Laboratories, Inc.) for 1h at room temperature. Blots were developed with an enhanced chemiluminescence substrate (GE Healthcare) using the ChemiDoc XRS+ System (Bio-Rad Laboratories, Hercules, CA). Quantification of bands by densitometry analysis was performed using Image Lab software, version 5.0 (Bio-Rad Laboratories).

### **Luciferase reporter assays**

The NF- $\kappa$ B [luc2P/NF- $\kappa$ B-RE] and AP-1 [luc2P/AP-1-RE] reporter constructs encode a *luc2P* (*Photinus pyralis*) gene that contains a protein destabilization sequence to better reflect induction and reduce treatment times and signal contamination by secondary effects. Cells were harvested for luciferase activity using a dual-luciferase assay kit (Promega) according to the

manufacturer's recommendations. Luciferase activity was measured using a VICTOR3 multi-label reader (PerkinElmer) and normalized to the activity of the renilla control.

### **NF- $\kappa$ B and AP-1 binding to DNA consensus sequences**

HEK293 cells ( $4 \times 10^6$ ) were seeded onto 100mm plates and transiently transfected with an empty vector-control plasmid (DDK-myc/pCMV6) as above in order to assess binding of NF- $\kappa$ B (p65 and p50) and AP-1 (cFos and phosphorylated cJun) to DNA under conditions similar to the NF- $\kappa$ B and AP-1 luciferase reporter assays. Nuclear extracts (5 $\mu$ g), prepared with NE-PER Nuclear and Cytoplasmic Extraction Reagents (ThermoScientific) supplemented with Halt™ Protease and Phosphatase Inhibitor Cocktail, were used for TransAM® assays (Active Motif, Carlsbad, CA) with immobilized NF- $\kappa$ B or AP-1 consensus oligonucleotides. Colorimetric reactions were developed for 3-6min and read on a microplate spectrophotometer at 450nm with a reference wavelength of 655nm.

### **Quantitative real-time PCR**

Total RNA was isolated using the RNeasy Mini Kit (QIAGEN, Valencia, CA) according to the manufacturer's instructions, including DNase I treatment. RNA samples were then subjected to reverse transcription using the iScript cDNA Synthesis Kit (Bio-Rad; Hercules, CA). Gene expression assays were performed by quantitative real-time PCR in duplicate or triplicate using SYBR Green primers (see Table S6) and iTaq Universal SYBR Green Supermix with ROX (Bio-Rad) on the Applied Biosystems ViiA™7 cycler (Life Technologies). Reactions without reverse transcriptase were performed to rule out amplification of any residual genomic DNA. Target

gene expression was normalized to  $\beta$ -actin and relative gene expression was calculated using the  $2^{-\Delta\Delta CT}$  method.

### **Immunocytochemistry**

PAECs were plated at a density of  $8 \times 10^4$  cells/well on collagen-coated round glass covers (Thermo Scientific Pierce). The following day complete media was replaced with media containing charcoal-stripped serum. Cells were pre-treated with MG132 (10 $\mu$ M) or vehicle control for 1h followed by treatment with SPL (10 $\mu$ M) or vehicle control for an additional 1h and then stimulation with TNF $\alpha$  (5ng/mL) or vehicle control for 1h. Cells were washed 3 times with PBS, fixed and penetrated with 3.7% formaldehyde containing 0.05% triton-100 for 10min at room temperature, and then washed 3 times with PBS. Slides were blocked for 1h at room temperature with 3% BSA in PBS containing 10% normal goat serum and then stained overnight at 4°C with anti-XPB antibody (sc293X, working concentration of 2 $\mu$ g/ml; Santa Cruz). The following day, cells were washed again 3 times with PBS and then incubated with AlexaFluor 488 secondary antibody (Invitrogen) or Phalloidin-568 (#A12380; 3 units/mL; Invitrogen) for 1h in the dark. Cells were washed with PBS, stained with DAPI for 5min and washed again. Cells were mounted using ProLong<sup>®</sup> Gold antifade reagent (Invitrogen). Confocal images were acquired on a Zeiss LSM 710 microscope equipped with photo multiplier tubes and a 63X plan-apochromat 1.4NA oil objective. Laser Scanning Module 5 software was used for image acquisition and ImageJ was used for image processing.

**Cytokine, chemokine and growth factor multiplex immunoassay**

Median fluorescence intensities were collected on a Luminex-200 instrument (Luminex, Bio-Rad). A minimum of 60 beads were acquired per analyte. Low out of range values were imputed using either the lowest concentration detected in any sample or the calculated bottom of the quantifiable range, whichever was lower, both derived from standard curves for each cytokine (Bioplex v6.2 software). Likewise, high out of range values were imputed using either the highest concentration detected in any sample or the calculated top of the quantifiable range, whichever was higher, both derived from standard curves for each cytokine. For cultured PAECs, each experimental condition was performed in triplicate and four independent experiments were completed, each using different donors. Of the 27 total cytokines measured, IL-2, IL-5, and eotaxin were excluded from the subsequent analysis because concentrations of these cytokines following TNF $\alpha$  stimulation were all very low and below the range of detection in  $\geq 50\%$  of the samples at all three time points. Patient samples were run in duplicate and concentrations were determined from the standard curve using a 5-point-regression to transform mean fluorescence intensities. Of the 27 total cytokines measured, IL-1 $\beta$ , IL-5, and IL-15 were excluded from the subsequent analysis because serum concentrations of these cytokines were very low in all samples and below the range of detection in  $\geq 50\%$  of patients.

**IL8 enzyme-linked immunosorbent assay (ELISA)**

PAECs ( $1 \times 10^5$ ) were seeded onto collagen-coated 12-well plates 24h prior to treatments as indicated. Cell supernatants were aspirated and cleared by centrifugation (10,000g for 5min at 4°C). Concentrations of IL8 in PAEC supernatants were determined using the Quantikine®

Colorimetric Sandwich ELISA kit (R&D Systems) according to the manufacturer's recommendations.

### **XPB siRNA gene silencing**

PAECs ( $1 \times 10^5$ ) were seeded in collagen-coated 6-well plates 24h prior to transfection. Cells were transfected with gene-specific siRNA targeting *ERCC3* (Dharmacon; Lafayette, CO) [siRNA#1 target sequence (Figure 4): GAUCAAGGUUAUAGCUUCA; siRNA#2 target sequence (Figure S5): CCGCGAAGAUGACAAA AUU) each at a final concentration of 10nM using DharmaFECT-1 (Dharmacon) in Opti-MEM (Invitrogen) for 6h followed by growth in EGM-2 containing 2% charcoal-stripped serum. Non-targeting siRNA (Dharmacon) (target sequence: UGGUUUACAUGUCGACUAA) was used as a control. After incubation of 48h from the time of transfection, cells were exposed to various treatments as indicated.

### **Chromatin immunoprecipitation assay**

PAECs ( $2 \times 10^6$ ) were seeded in medium containing charcoal-stripped serum onto collagen-coated 15cm culture dishes 24h prior to treatment. Chromatin immunoprecipitation was performed using the EZ ChIP™ kit (EMD Millipore) according to the manufacturer's recommendations. Cells were cross-linked with 1% formaldehyde and then sonicated (Misonix) with microtip probe 4418 at a power setting of 4 and a 30% duty cycle. Sonication was performed 3 times for 10s with 50s cooling on ice between each pulse, shearing chromatin into 200-1000bp fragments. Chromatin fragments were precipitated overnight at 4°C with anti-XPB (clone S-19, sc-293, Santa Cruz Biotechnology, Inc.), anti-RNAPII (RNA pol II; clone CTD4H8, #05-623B, EMD Millipore), anti-pSer5-RNAPII (clone H14, #920401, Biolegend, San Diego, CA), or control

mouse IgG (#12-371B, Millipore). Precipitated protein/DNA complexes were eluted and crosslinking reversed for DNA purification. Independent experiments were performed using different donors. Purified DNA products were analyzed by quantitative real-time PCR using iTaq Universal SYBR Green Supermix with ROX using the Applied Biosystems ViiA<sup>TM</sup>7 instrument. The *IL8* promoter region (-121 to +61) was amplified with the primer pairs 5'-GGGCCATCAGTTGCAAATC-3' and 5'-TTCCTTCCGGTGGTTTCTTC-3', and the *NFKBIA* promoter region (-168 to +21) was amplified with the primer pairs 5'-CTCATCGCAGGGAGTTTCT-3' and 5'-ACTGCTGTGGGCTCTGCA-3'.<sup>3</sup> PCR reactions were performed in triplicate. XPB, RNAPII and pSer5-RNAPII promoter enrichment were calculated as a percentage of input DNA relative to vehicle treated, unstimulated cells.

### **Rat lung from the monocrotaline model of pulmonary hypertension**

Samples were stored at -80°C until further processing. Samples were thawed on ice and RIPA buffer (4μL/mg of lung tissue) containing Halt Protease and phosphatase inhibitor cocktail (Invitrogen) was added at a final concentration of 3X. Lung tissue samples were mechanically disrupted using a TissueLyser (QIAGEN) according to the manufacture's recommendations. Briefly, the samples were precooled on ice and TissueLyser disruption was performed for 30s at 30Hz followed by 10min incubation on ice. An additional 6 cycles of disruption were performed (15s at 30Hz alternating with 10min incubation on ice). Following the last cycle, the samples were incubated for 30min on ice with intermittent gentle agitation. Lysates were cleared by centrifugation (20,000g for 20min at 4°C) and the supernatants were transferred to new tubes.



## Statistical analysis

Dose response analyses for SPL and EPL were carried out by testing a null hypothesis that the linear regression slope equals zero except when noted. Random effects were added to the models to account for repeated measures. For quantitative real-time PCR, delta cycle thresholds rather than fold-changes were analyzed, as the latter are not normally distributed. For the analysis of secreted cytokines, chemokines and growth factors in PAECs, we tested for an interaction between each treatment and time and reported the main treatment effect when the interaction was non-significant. A multivariate analysis was performed to estimate the effects of SPL on circulating levels of inflammatory markers in a cohort of PAH patients. Cytokines (n=24) were analyzed together to increase power. Patient-level covariates examined for potential imbalances between the two groups (No SPL *versus* SPL) included age, gender, race, body mass index, diagnosis (idiopathic PAH, connective tissue disease-associated PAH versus other disease-associated PAH), New York Heart Associated-World Health Organization functional classification, 6-minute walk distance, and medication use (PDE5 inhibitors, ET-1 receptor antagonists, continuous PGI<sub>2</sub> infusions, warfarin, and anti-inflammatory therapies). Covariates were compared between the two groups using a Chi-squared test or Fisher's exact test for categorical variables, and t-tests for continuous variables (see Table S2). For the main analysis, only concurrent PAH-specific medications (PDE5 inhibitors, ET-1 receptor antagonists and continuous PGI<sub>2</sub> infusions) and patient-level covariates that showed evidence of imbalance ( $P \leq 0.20$ ) were included in the model. To allow for different patterns for each cytokine, all two-way interaction terms involving a cytokine were included ("Full Model"). The Full Model was then simplified by removing non-significant interaction terms ("Reduced Model"). Several sensitivity analyses were performed including restriction of patient-level covariates to those that reached

statistical significance (i.e. prostacyclin infusion, hydroxychloroquine use, and obesity), propensity score adjustment and removing the 5 patients treated with hydroxychloroquine.

**REFERENCES**

1. Dougherty EJ, Elinoff JM, Ferreyra GA, Hou A, Cai R, Sun J, *et al.* Mineralocorticoid Receptor (MR) Trans-Activation of Inflammatory AP-1 Signaling: Dependence on DNA Sequence, MR Conformation, and AP-1 Family Member Expression. *J Biol Chem* 2016.
2. Gomez-Sanchez CE, de Rodriguez AF, Romero DG, Estess J, Warden MP, Gomez-Sanchez MT, *et al.* Development of a panel of monoclonal antibodies against the mineralocorticoid receptor. *Endocrinology* 2006;**147**:1343-1348.
3. Nissen RM, Yamamoto KR. The glucocorticoid receptor inhibits NFkappaB by interfering with serine-2 phosphorylation of the RNA polymerase II carboxy-terminal domain. *Genes Dev* 2000;**14**:2314-2329.

**FIGURE LEGENDS****Figure S1. SPL suppresses NF- $\kappa$ B and AP-1 promoter activity independent of PR, PXR, RXR $\gamma$ , and PXR+ RXR $\gamma$  expression in HEK293 cells.**

(A) Total cell lysate Western blots demonstrate human PR overexpression in HEK293 cells. As seen previously, in the absence of nuclear receptor overexpression, SPL dose-dependently suppressed NF- $\kappa$ B and AP-1 reporter activity ( $P < 0.0001$  for both). PR expression independent of SPL modestly suppressed NF- $\kappa$ B reporter activity ( $P = 0.01$  for a PR main effect;  $P > 0.3$  for an interaction with SPL). Basal AP-1 reporter activity was suppressed by PR in the absence of SPL ( $P < 0.0001$ ). SPL concentrations  $\leq 5 \mu\text{M}$  dose-dependently increased ( $*P = 0.03$ ), while  $10 \mu\text{M}$  decreased AP-1 activity ( $****P < 0.0001$ ).

(B) Total cell lysate Western blots demonstrate human PXR and RXR $\gamma$  overexpression in HEK293 cells. Endogenous RXR $\gamma$  but not PXR was detected in these cells. Similar to MR, GR and AR, SPL dose-dependently suppressed NF- $\kappa$ B and AP-1 activity in the absence and presence of PXR, RXR $\gamma$  and PXR+RXR $\gamma$  overexpression ( $P < 0.0001$  the downward trend of the slopes). PXR and PXR+RXR $\gamma$  overexpression, again independent of SPL ( $P > 0.2$  for interactions with SPL), modestly suppressed NF- $\kappa$ B ( $P < 0.04$  for both main effects), but conversely increased AP-1 signaling ( $P < 0.0001$  for both main effects). Twenty-four hours following transfection, cells were treated for 1h with either vehicle control or SPL followed by stimulation with either TNF $\alpha$  (10ng/mL; NF- $\kappa$ B activation) or PMA (100nM; AP-1 activation) for 5h. Luciferase activity was normalized to the renilla control. Luciferase results from five (panel A) and four (panel B) independent experiments, respectively, are presented relative to unstimulated control (mean $\pm$ SE).

**Figure S2. SPL suppression of NF- $\kappa$ B and AP-1 is independent of DNA binding or new protein synthesis, but reversed by proteasome inhibition.** (A) TNF $\alpha$  significantly increased p65 and p50 DNA binding. However, DNA binding was unchanged across all three conditions (vehicle control, SPL and EPL) for p65 and p50. (B) PMA significantly induced cFos and cJun binding relative to control treated cells. Similar to NF- $\kappa$ B, AP-1 binding was unchanged across the three conditions for cFos and cJun. Vehicle control, SPL (10 $\mu$ M) or EPL (10 $\mu$ M) were added 1h prior to stimulation with TNF $\alpha$  (10ng/mL) or PMA (100nM). Data is presented as mean absorbance  $\pm$ SE of three independent experiments. (C) In the presence of CHX (100 $\mu$ g/mL), TNF $\alpha$  stimulation resulted in super-induction of the NF- $\kappa$ B reporter gene (NF- $\kappa$ B *luc2P*;  $P < 0.01$  for the interaction between TNF $\alpha$  and CHX). However, SPL significantly and similarly suppressed NF- $\kappa$ B reporter activity in the absence and presence of CHX ( $P = 0.89$  and  $P = 0.76$  for the interaction of SPL and CHX in the absence and presence of TNF $\alpha$ , respectively). NF- $\kappa$ B-driven *luc2P* mRNA, as determined by quantitative real-time PCR, is presented as fold-change relative to unstimulated cells (geometric mean  $\pm$  geometric SE) of four independent experiments, plotted on log<sub>10</sub> scale. (D) Basal AP-1 reporter activity was higher ( $P < 0.0001$ ), while PMA-induced AP-1 activity was lower in the presence of MG132 ( $P = 0.0001$ ). Importantly, MG132 completely blocked SPL-mediated suppression of PMA-induced AP-1 reporter activation (five independent experiments). Luciferase activity (LUC) was normalized to renilla control (REN) and results are presented as the geometric mean LUC/REN ratio (x100)  $\pm$  geometric SE plotted on a log<sub>10</sub> scale. \*,  $P < 0.05$ ; \*\*\*\*  $P < 0.0001$  (ANOVA with post-hoc tests, as indicated).

**Figure S3. SPL increases proteasomal degradation of XPB but does not affect XPB (*ERCC3*) mRNA levels in HEK293 cells.** (A) SPL significantly decreased XPB protein levels in

the absence and presence of MG132. However, in the presence of MG132, SPL-induced degradation of XPB was significantly decreased. In contrast to SPL, EPL had no effect on XPB protein levels in either the absence or presence of MG-132 ( $P=0.70$  for the main effect of EPL). Total cell lysates were collected concurrent with the timing of luciferase assay experiments (Figure S2D), resolved by SDS-PAGE and immunoblotted for XPB and  $\beta$ -actin. Densitometric quantification of XPB protein expression relative to  $\beta$ -actin is presented as mean ratio  $\pm$ SE of six independent experiments and a representative Western blot is shown below the graph. (B) *ERCC3* mRNA expression was not reduced by SPL treatment in either the absence ( $P=0.16$ ) or presence of PMA ( $P=0.25$ ). Expression of mRNA as determined by quantitative real-time PCR is presented as the fold-change relative to unstimulated cells (geometric mean  $\pm$  geometric SE) of three independent experiments. \*,  $P<0.05$ ; \*\*\*\*  $P<0.0001$  (ANOVA with post-hoc tests, as indicated).

**Figure S4. Proteasome inhibition blocked the effect of SPL on PMA-induced PTGS2 and IL8 protein expression in PAECs.** (A) SPL significantly decreased PMA-induced PTGS2 protein expression, whereas pretreatment with MG132 blocked SPL-mediated suppression as determined by total cell lysate Western blots. Densitometric quantification of PTGS2 protein expression relative to  $\beta$ -actin is presented on  $\log_{10}$  scale of four independent experiments using different donors (geometric mean ratio  $\pm$  geometric SE). A representative Western blot is shown below the graph. (B) Likewise, MG132 blocked SPL-mediated suppression of PMA-induced IL8 expression in PAECs as determined by ELISA of cell supernatants. PAECs were pre-treated with MG132 (10 $\mu$ M) for 1h followed by treatment with SPL for 1h and then stimulation with PMA (10nM) for 4h. Data are presented as the  $\log_{10}$ -transformed concentration of five independent

experiments using different donors (mean $\pm$ SE). \*,  $P < 0.05$ ; \*\*,  $P < 0.01$ ; \*\*\*,  $P < 0.001$ ; \*\*\*\*  $P < 0.0001$  (ANOVA with post-hoc tests, as indicated).

**Figure S5. SPL in combination with XPB knockdown further suppresses TNF $\alpha$  target genes in PAECs.** (A) Similar to Figure 4A, SPL treatment and XPB knockdown using a second siRNA both significantly reduced XPB protein levels, but the impact of SPL was significantly greater than XPB knockdown alone. Densitometric quantification of XPB protein expression relative to  $\beta$ -actin is presented as the geometric mean ratio  $\pm$  geometric SE on  $\log_{10}$  scale of four independent experiments, each with a different donor. A representative Western blot is shown below the graph. (B) SPL suppressed TNF $\alpha$ -induced *IL8*, *IL6*, and *CCL2*, but not *NFKBIA* ( $P=0.66$ ) mRNA expression in PAECs transfected with siCTRL. Compared to SPL alone, the combination of XPB knockdown and SPL had a stronger suppressive effect on TNF $\alpha$ -induced *IL6*, *CCL2* and *NFKBIA*. Expression of mRNA measured by quantitative real-time PCR is presented as the fold-change relative to unstimulated cells transfected with siCTRL (geometric mean  $\pm$  geometric SE) of four independent experiments, each with a different donor, plotted on  $\log_{10}$  scale. \*,  $P < 0.05$ ; \*\*,  $P < 0.01$ ; \*\*\*,  $P < 0.001$ ; \*\*\*\*  $P < 0.0001$  (ANOVA with post-hoc tests, as indicated).

**Figure S1**

**A**

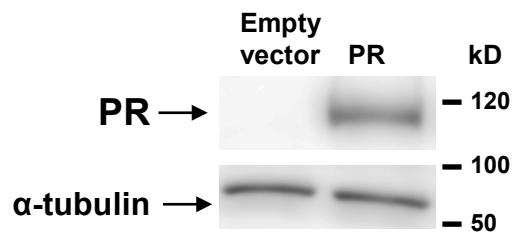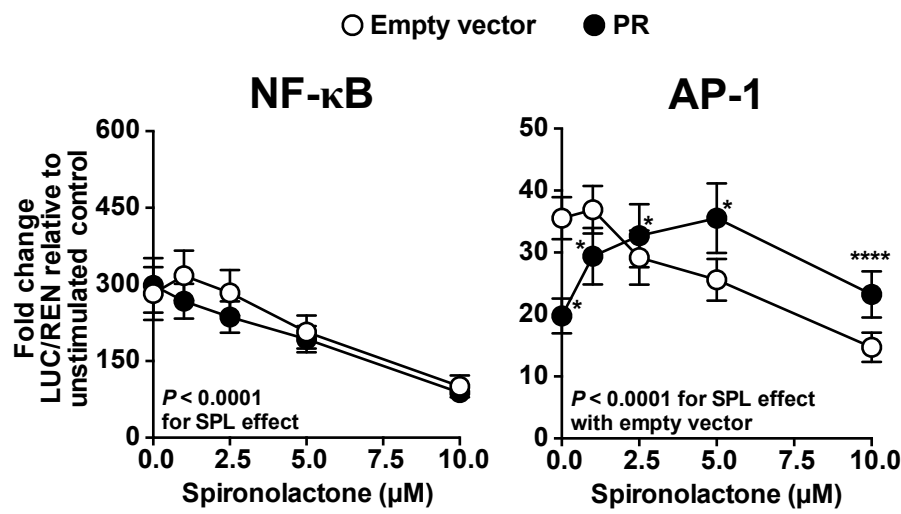

**B**

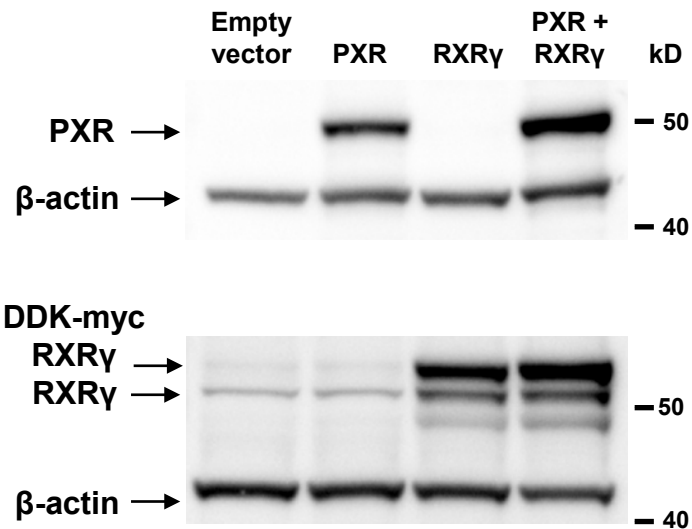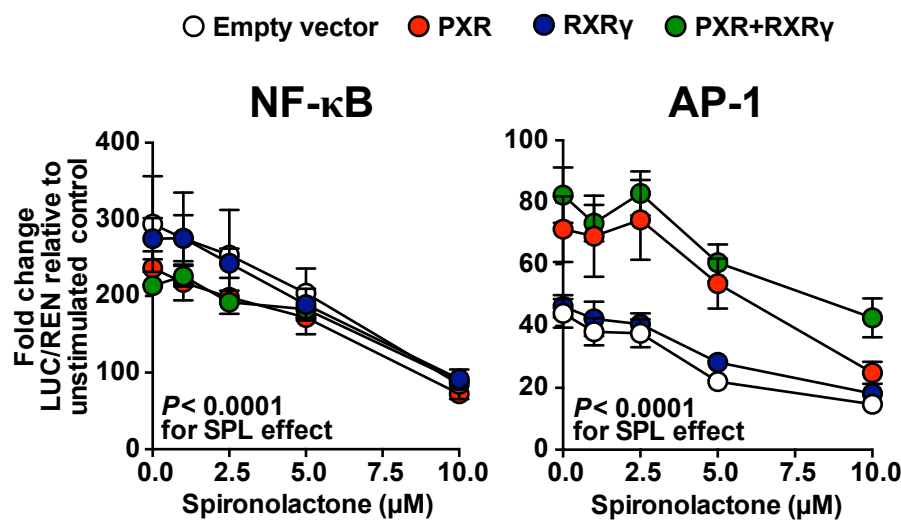



Figure S2

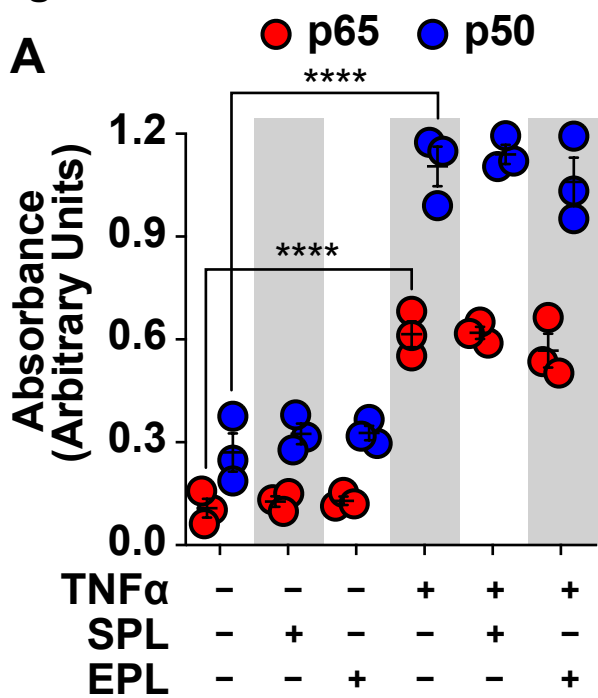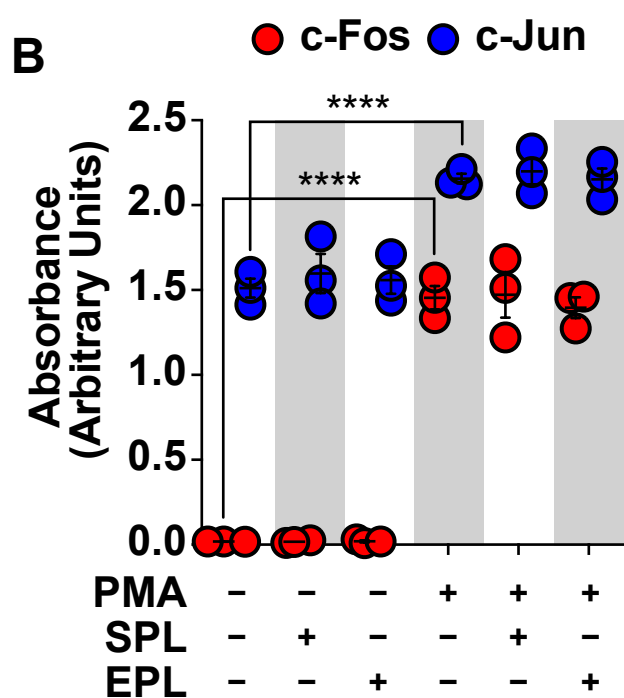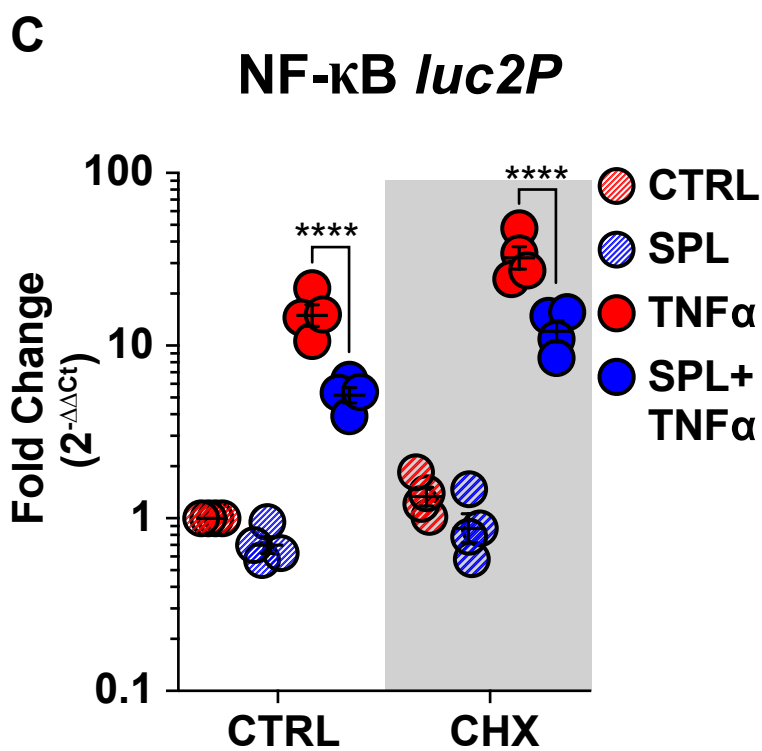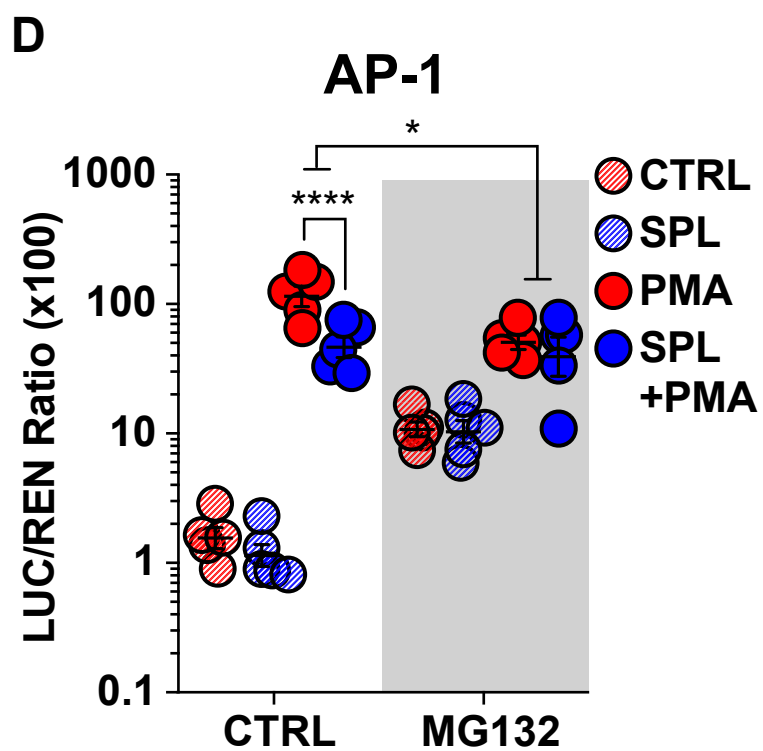

Figure S3

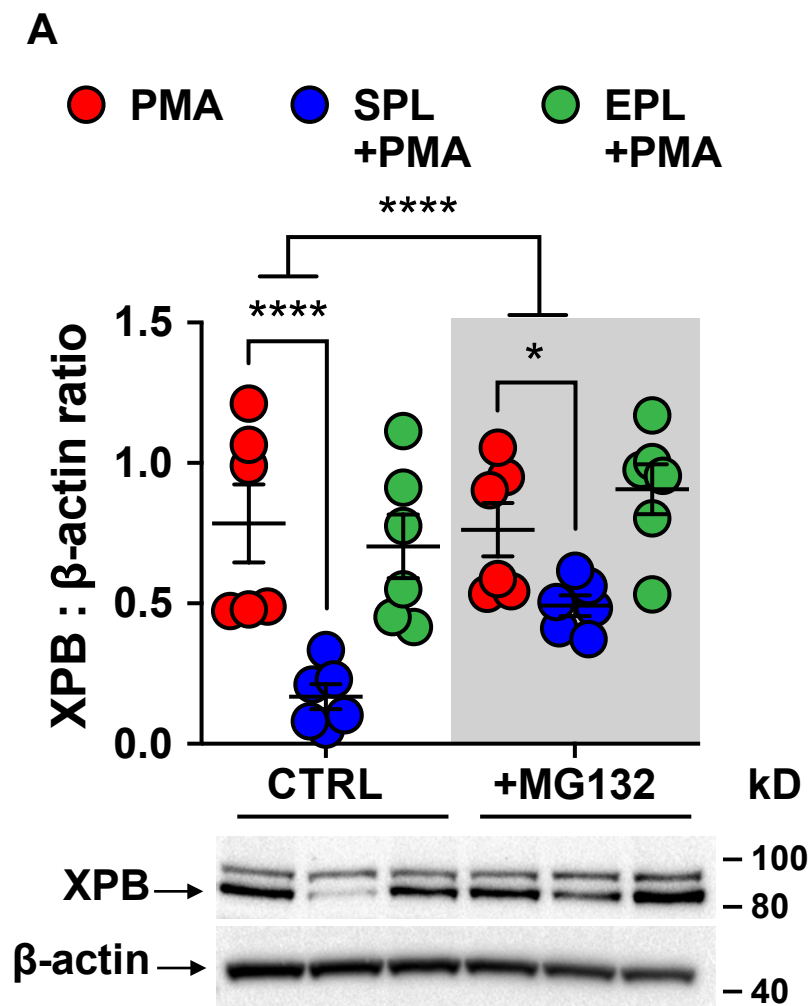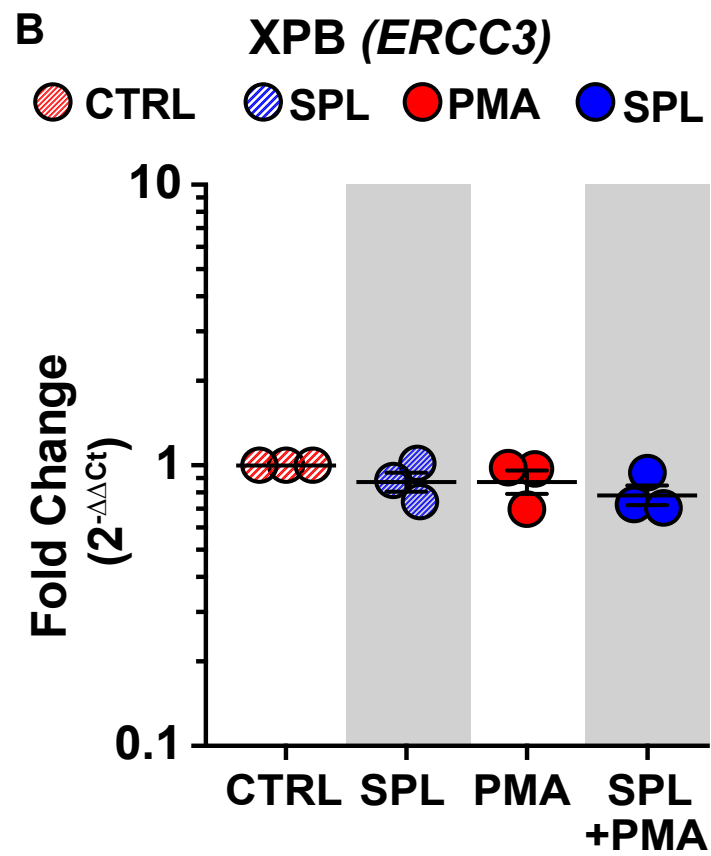

Figure S4

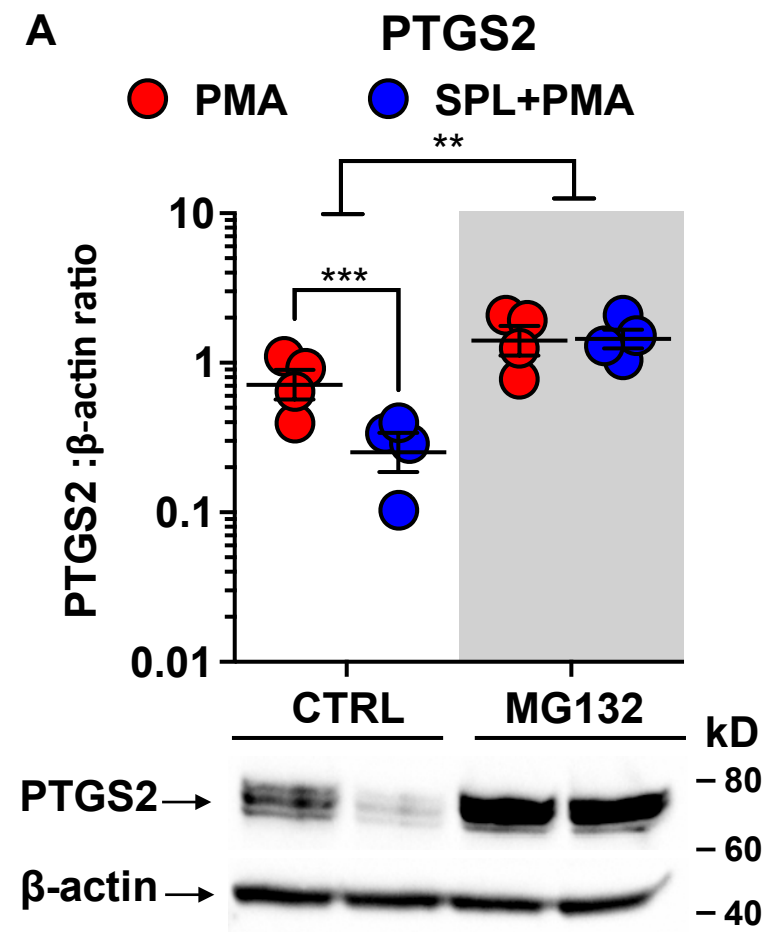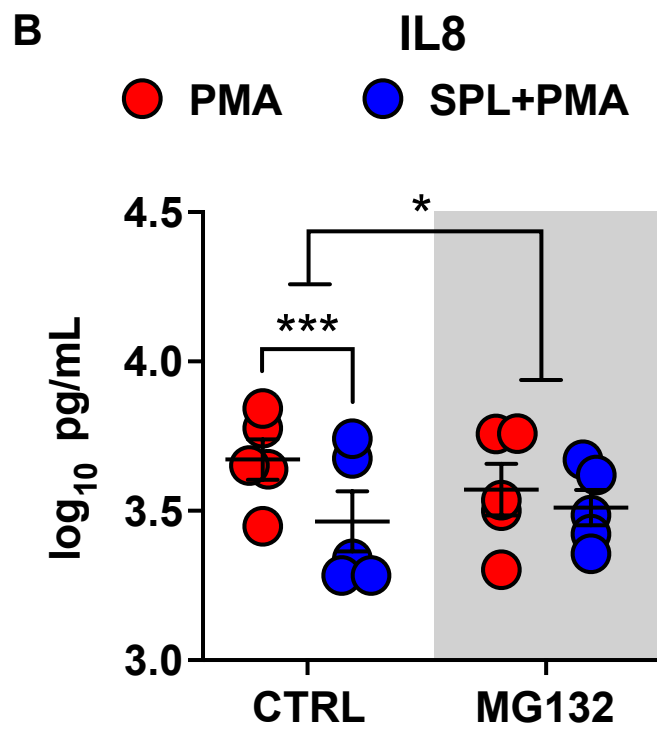

Figure S5

**A** ● TNF $\alpha$  ● SPL+TNF $\alpha$

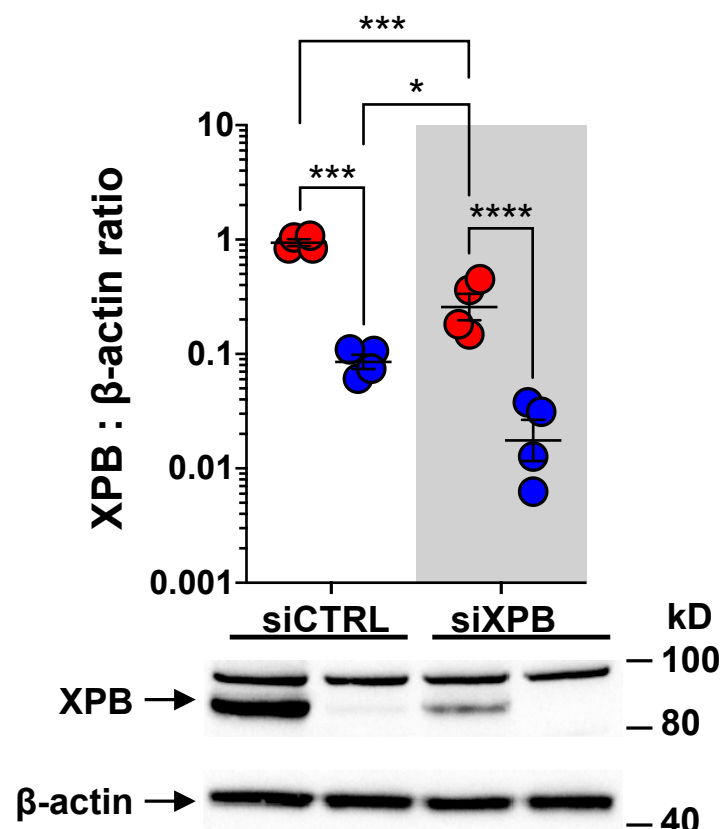

**B**

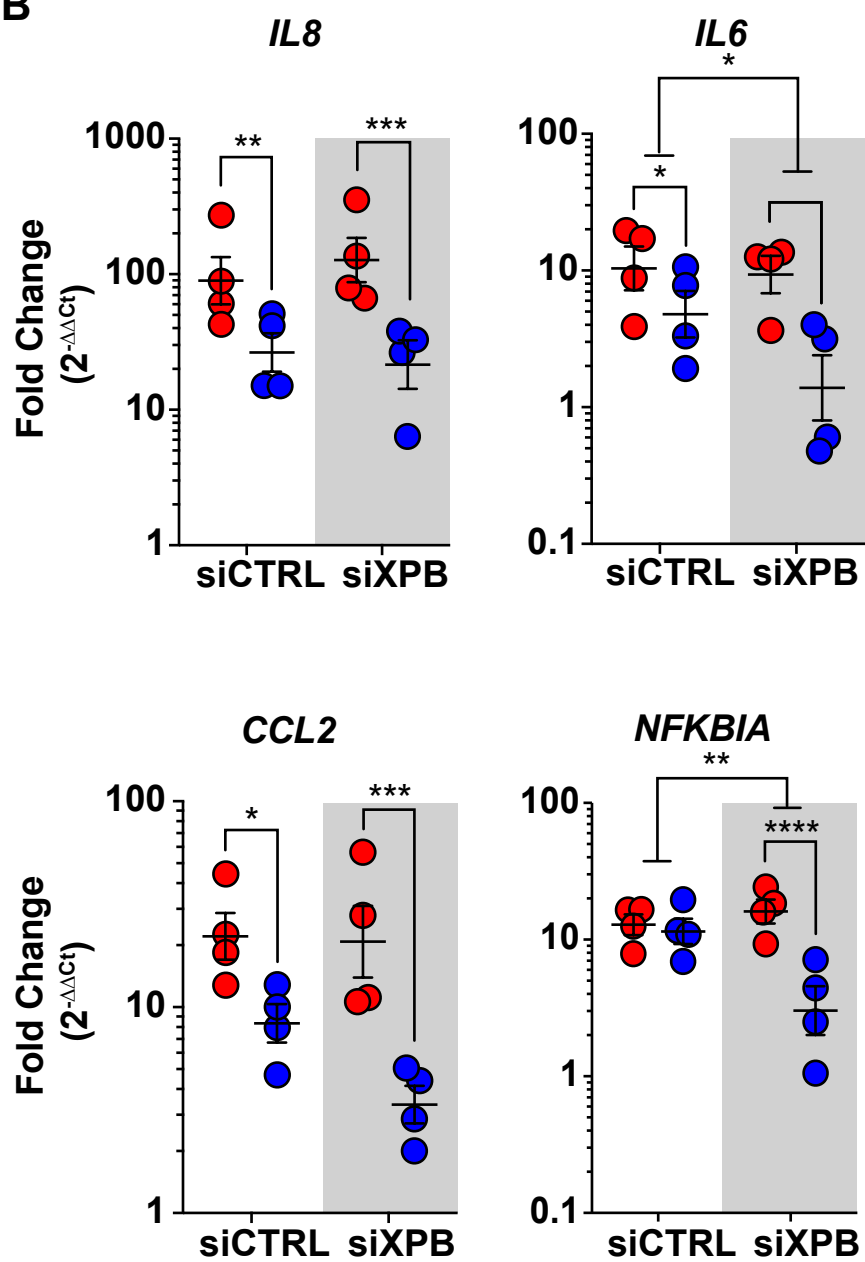

Table S1. Human Pulmonary Artery Endothelial Cell Donors

| <b>Donor Lot #</b> | <b>Age (years)</b> | <b>Gender</b> | <b>Assays</b>                              | <b>Company</b> |
|--------------------|--------------------|---------------|--------------------------------------------|----------------|
| 225531             | 45                 | Female        | Bio-Plex®                                  | Lonza          |
| 329447             | 40                 | Male          | Bio-Plex®, qRT-PCR, WB, siRNA, ChIP        | Lonza          |
| 466719             | 57                 | Male          | IF, WB, qRT-PCR, siRNA                     |                |
| 493459             | 60                 | Male          | WB, ELISA, siRNA, qRT-PCR                  |                |
| 608199             |                    |               | ELISA                                      |                |
| 4F3034             | 51                 | Female        | Bio-Plex®, WB, ELISA, siRNA, ChIP          | Lonza          |
| 4F3033             | 51                 | Male          | IF, qRT-PCR, ELISA, siRNA, ChIP            | Lonza          |
| 4F3041             | 52                 | Female        | Bio-Plex®, qRT-PCR, WB, ELISA, siRNA, ChIP | Lonza          |
| 4F3028             | 21                 | Male          | WB, qRT-PCR, siRNA, ChIP                   | Lonza          |

Abbreviations: qRT-PCR, quantitative real-time PCR; ChIP, chromatin immunoprecipitation; IF, immunofluorescence; WB, Western blot

**Table S2. Human Fibroblasts from the National Institute of General Medical Sciences (NIGMS) Genetic Cell Repository**

| <b>Donor #</b> | <b>Age<br/>(years)</b> | <b>Gender</b> | <b>Mutation</b>                    | <b>Clinical Description</b>  |
|----------------|------------------------|---------------|------------------------------------|------------------------------|
| GM13025        | 39                     | Male          | F99S                               | Mild form of XP/CS complex   |
| GM13027        | 63                     | Female        | Not a carrier of the F99S mutation | Unaffected mother of GM13025 |
| GM21072        | 10                     | Female        | Q545X and Q739insX42               | Severe form of XP/CS complex |

Abbreviations: XP, Xeroderma Pigmentosum; CS, Cockayne syndrome

Table S3. The Effect of SPL and EPL on TNF $\alpha$ -induced Cytokine, Chemokine and Growth Factor Production in Primary Human Pulmonary Artery Endothelial Cells

|                  | 4h           |            |                          |                      | 8h           |            |                          |                      | 24h                  |                      |                          |                      | Treatment*Time      |                                  |
|------------------|--------------|------------|--------------------------|----------------------|--------------|------------|--------------------------|----------------------|----------------------|----------------------|--------------------------|----------------------|---------------------|----------------------------------|
|                  | Mean (pg/mL) | SE (pg/mL) | Fold-Change <sup>a</sup> | P-value <sup>b</sup> | Mean (pg/mL) | SE (pg/mL) | Fold-Change <sup>a</sup> | P-value <sup>b</sup> | Mean (pg/mL)         | SE (pg/mL)           | Fold-Change <sup>a</sup> | P-value <sup>b</sup> | Interaction P-value | Main Effect P-value <sup>c</sup> |
| IL1 $\beta$      |              |            |                          |                      |              |            |                          |                      |                      |                      |                          |                      |                     |                                  |
| CTRL             | 1.54         | 0.69       | 0.13                     | 0.0003               | 1.35         | 0.57       | 0.12                     | <0.0001              | 1.91                 | 0.80                 | 0.25                     | 0.001                | 0.47                | <0.0001                          |
| TNF $\alpha$     | 11.91        | 0.63       | REF                      | REF                  | 10.86        | 0.38       | REF                      | REF                  | 7.57                 | 1.27                 | REF                      | REF                  | REF                 | REF                              |
| SPL+TNF $\alpha$ | 12.63        | 1.42       | 1.06                     | 0.92                 | 7.46         | 0.93       | 0.69                     | 0.30                 | 5.56                 | 1.33                 | 0.74                     | 0.27                 | 0.31                | 0.08                             |
| EPL+TNF $\alpha$ | 13.40        | 0.55       | 1.13                     | 0.79                 | 11.21        | 1.35       | 1.03                     | 0.97                 | 7.61                 | 1.10                 | 1.00                     | 0.94                 | 0.85                | 0.52                             |
| IL1ra            |              |            |                          |                      |              |            |                          |                      |                      |                      |                          |                      |                     |                                  |
| CTRL             | 33.29        | 4.32       | 0.14                     | <0.0001              | 27.95        | 6.14       | 0.11                     | <0.0001              | 23.31                | 9.70                 | 0.07                     | 0.002                | 0.24                | <0.0001                          |
| TNF $\alpha$     | 239.89       | 20.02      | REF                      | REF                  | 250.61       | 13.42      | REF                      | REF                  | 352.35               | 52.13                | REF                      | REF                  | REF                 | REF                              |
| SPL+TNF $\alpha$ | 214.38       | 37.65      | 0.89                     | 0.37                 | 127.73       | 4.75       | 0.51                     | 0.01                 | 199.34               | 25.03                | 0.57                     | 0.51                 | 0.02                | NA                               |
| EPL+TNF $\alpha$ | 260.55       | 33.86      | 1.09                     | 0.67                 | 263.82       | 42.51      | 1.05                     | 0.94                 | 340.42               | 53.20                | 0.97                     | 0.97                 | 0.76                | 0.79                             |
| IL4              |              |            |                          |                      |              |            |                          |                      |                      |                      |                          |                      |                     |                                  |
| CTRL             | 1.92         | 0.13       | 0.45                     | <0.0001              | 1.61         | 0.30       | 0.36                     | 0.0001               | 1.37                 | 0.28                 | 0.22                     | <0.0001              | 0.03                | NA                               |
| TNF $\alpha$     | 4.26         | 0.27       | REF                      | REF                  | 4.50         | 0.36       | REF                      | REF                  | 6.19                 | 0.71                 | REF                      | REF                  | REF                 | REF                              |
| SPL+TNF $\alpha$ | 3.73         | 0.61       | 0.87                     | 0.14                 | 3.20         | 0.16       | 0.71                     | 0.08                 | 4.54                 | 0.48                 | 0.73                     | 0.10                 | 0.36                | <0.0001                          |
| EPL+TNF $\alpha$ | 4.68         | 0.50       | 1.10                     | 0.45                 | 4.62         | 0.51       | 1.03                     | 0.92                 | 5.96                 | 0.64                 | 0.96                     | 0.84                 | 0.29                | 0.48                             |
| IL6              |              |            |                          |                      |              |            |                          |                      |                      |                      |                          |                      |                     |                                  |
| CTRL             | 130.07       | 30.84      | 0.30                     | <0.0001              | 143.95       | 38.63      | 0.26                     | <0.0001              | 213.07               | 56.07                | 0.07                     | <0.0001              | 0.0002              | NA                               |
| TNF $\alpha$     | 436.12       | 71.74      | REF                      | REF                  | 543.54       | 94.44      | REF                      | REF                  | 2910.71              | 559.39               | REF                      | REF                  | REF                 | REF                              |
| SPL+TNF $\alpha$ | 287.27       | 50.24      | 0.66                     | 0.04                 | 340.02       | 69.39      | 0.63                     | 0.01                 | 1607.45              | 421.05               | 0.55                     | 0.01                 | 0.94                | 0.0002                           |
| EPL+TNF $\alpha$ | 448.40       | 90.42      | 1.03                     | 0.95                 | 542.84       | 124.32     | 1.00                     | 0.73                 | 2965.06              | 1358.29              | 1.02                     | 0.64                 | 0.96                | 0.78                             |
| IL7              |              |            |                          |                      |              |            |                          |                      |                      |                      |                          |                      |                     |                                  |
| CTRL             | 29.06        | 7.31       | 0.86                     | 0.01                 | 25.50        | 5.71       | 0.79                     | 0.001                | 18.27                | 2.12                 | 0.58                     | <0.0001              | 0.01                | NA                               |
| TNF $\alpha$     | 33.87        | 6.86       | REF                      | REF                  | 32.39        | 6.00       | REF                      | REF                  | 31.53                | 4.72                 | REF                      | REF                  | REF                 | REF                              |
| SPL+TNF $\alpha$ | 30.69        | 7.54       | 0.91                     | 0.04                 | 28.23        | 6.21       | 0.87                     | 0.01                 | 31.83                | 6.15                 | 1.01                     | 0.90                 | 0.21                | 0.02                             |
| EPL+TNF $\alpha$ | 34.36        | 9.11       | 1.01                     | 0.71                 | 31.87        | 7.23       | 0.98                     | 0.49                 | 33.34                | 4.47                 | 1.06                     | 0.28                 | 0.54                | 0.97                             |
| IL8              |              |            |                          |                      |              |            |                          |                      |                      |                      |                          |                      |                     |                                  |
| CTRL             | 673.52       | 82.96      | 0.08                     | <0.0001              | 726.39       | 96.44      | 0.03                     | <0.0001              | 1145.18              | 102.75               | 0.003                    | <0.0001              | <0.0001             | NA                               |
| TNF $\alpha$     | 8103.17      | 1385.48    | REF                      | REF                  | 22153.98     | 2148.72    | REF                      | REF                  | 3.80x10 <sup>5</sup> | 1.18x10 <sup>5</sup> | REF                      | REF                  | REF                 | REF                              |
| SPL+TNF $\alpha$ | 2991.80      | 543.78     | 0.37                     | 0.003                | 5709.17      | 973.50     | 0.26                     | <0.0001              | 20017.47             | 3897.17              | 0.05                     | <0.0001              | 0.001               | NA                               |
| EPL+TNF $\alpha$ | 8581.48      | 1876.42    | 1.06                     | 0.90                 | 22268.07     | 2604.62    | 1.01                     | 0.99                 | 3.16x10 <sup>5</sup> | 1.10x10 <sup>5</sup> | 0.83                     | 0.54                 | 0.87                | 0.77                             |
| IL9              |              |            |                          |                      |              |            |                          |                      |                      |                      |                          |                      |                     |                                  |
| CTRL             | 5.13         | 1.82       | 0.72                     | 0.06                 | 4.43         | 1.46       | 0.69                     | 0.09                 | 3.58                 | 1.58                 | 0.38                     | 0.03                 | 0.23                | 0.01                             |
| TNF $\alpha$     | 7.16         | 2.42       | REF                      | REF                  | 6.44         | 1.90       | REF                      | REF                  | 9.39                 | 3.11                 | REF                      | REF                  | REF                 | REF                              |
| SPL+TNF $\alpha$ | 5.55         | 1.93       | 0.78                     | 0.14                 | 4.39         | 1.49       | 0.68                     | 0.09                 | 7.29                 | 2.60                 | 0.78                     | 0.17                 | 0.49                | 0.03                             |
| EPL+TNF $\alpha$ | 7.13         | 2.58       | 1.00                     | 0.89                 | 7.53         | 2.48       | 1.17                     | 0.85                 | 9.69                 | 2.88                 | 1.03                     | 0.78                 | 0.97                | 0.78                             |

|                   |         |        |      |       |         |        |      |         |         |         |      |         |         |         |  |
|-------------------|---------|--------|------|-------|---------|--------|------|---------|---------|---------|------|---------|---------|---------|--|
| IL10              |         |        |      |       |         |        |      |         |         |         |      |         |         |         |  |
| CTRL              | 30.08   | 5.24   | 1.04 | 0.57  | 25.80   | 4.46   | 1.06 | 0.90    | 20.15   | 4.27    | 1.09 | 0.94    | 0.99    | 0.80    |  |
| TNF $\alpha$      | 28.82   | 6.11   | REF  | REF   | 24.44   | 0.93   | REF  | REF     | 18.44   | 0.80    | REF  | REF     | REF     | REF     |  |
| SPL+TNF $\alpha$  | 30.71   | 3.75   | 1.07 | 0.32  | 21.57   | 1.38   | 0.88 | 0.39    | 19.14   | 1.93    | 1.04 | 0.90    | 0.41    | 1.00    |  |
| EPL+TNF $\alpha$  | 32.29   | 8.02   | 1.12 | 0.39  | 26.23   | 5.79   | 1.07 | 0.98    | 20.29   | 0.65    | 1.10 | 0.63    | 0.92    | 0.52    |  |
| IL12p70           |         |        |      |       |         |        |      |         |         |         |      |         |         |         |  |
| CTRL              | 107.70  | 46.28  | 0.96 | 0.56  | 87.70   | 39.04  | 1.04 | 0.48    | 30.58   | 4.96    | 0.69 | 0.01    | 0.36    | 0.17    |  |
| TNF $\alpha$      | 112.06  | 49.25  | REF  | REF   | 84.21   | 30.02  | REF  | REF     | 44.03   | 12.05   | REF  | REF     | REF     | REF     |  |
| SPL+TNF $\alpha$  | 109.13  | 46.40  | 0.97 | 0.81  | 87.19   | 34.94  | 1.04 | 0.94    | 49.90   | 17.56   | 1.13 | 0.51    | 0.76    | 0.71    |  |
| EPL+TNF $\alpha$  | 115.95  | 55.67  | 1.03 | 0.84  | 89.74   | 37.31  | 1.07 | 0.90    | 45.54   | 11.64   | 1.03 | 0.67    | 0.95    | 0.83    |  |
| IL13              |         |        |      |       |         |        |      |         |         |         |      |         |         |         |  |
| CTRL              | 19.51   | 3.93   | 0.83 | 0.03  | 19.15   | 3.67   | 0.77 | 0.0001  | 15.19   | 3.18    | 0.61 | 0.0002  | 0.03    | NA      |  |
| TNF $\alpha$      | 23.54   | 4.44   | REF  | REF   | 24.76   | 3.89   | REF  | REF     | 24.92   | 3.39    | REF  | REF     | REF     | REF     |  |
| SPL+TNF $\alpha$  | 20.69   | 4.69   | 0.88 | 0.06  | 21.49   | 3.99   | 0.87 | 0.01    | 23.28   | 4.23    | 0.93 | 0.33    | 0.71    | 0.003   |  |
| EPL+TNF $\alpha$  | 23.85   | 4.79   | 1.01 | 0.91  | 24.53   | 4.60   | 0.99 | 0.52    | 24.72   | 3.41    | 0.99 | 0.92    | 0.89    | 0.74    |  |
| IL15              |         |        |      |       |         |        |      |         |         |         |      |         |         |         |  |
| CTRL              | 87.82   | 26.03  | 0.34 | 0.001 | 93.70   | 27.28  | 0.24 | <0.0001 | 138.25  | 33.91   | 0.29 | <0.0001 | 0.65    | <0.0001 |  |
| TNF $\alpha$      | 254.60  | 32.17  | REF  | REF   | 386.60  | 7.50   | REF  | REF     | 475.46  | 10.76   | REF  | REF     | REF     | REF     |  |
| SPL+TNF $\alpha$  | 160.03  | 10.64  | 0.63 | 0.11  | 226.01  | 14.15  | 0.58 | 0.03    | 401.66  | 12.47   | 0.84 | 0.34    | 0.03    | NA      |  |
| EPL+TNF $\alpha$  | 268.80  | 33.44  | 1.06 | 0.83  | 398.03  | 28.61  | 1.03 | 0.92    | 474.59  | 12.60   | 1.00 | 0.99    | 0.91    | 0.64    |  |
| IL17              |         |        |      |       |         |        |      |         |         |         |      |         |         |         |  |
| CTRL              | 33.92   | 8.38   | 0.70 | 0.004 | 29.81   | 5.67   | 0.65 | 0.01    | 24.32   | 6.31    | 0.33 | 0.0003  | 0.01    | NA      |  |
| TNF $\alpha$      | 48.75   | 9.18   | REF  | REF   | 45.86   | 7.84   | REF  | REF     | 73.98   | 15.56   | REF  | REF     | REF     | REF     |  |
| SPL+TNF $\alpha$  | 37.76   | 6.70   | 0.77 | 0.05  | 28.33   | 5.76   | 0.62 | 0.005   | 49.13   | 11.31   | 0.66 | 0.07    | 0.36    | <0.0001 |  |
| EPL+TNF $\alpha$  | 50.50   | 11.03  | 1.04 | 0.91  | 46.50   | 12.31  | 1.01 | 0.56    | 74.16   | 14.13   | 1.00 | 0.95    | 0.88    | 0.83    |  |
| FGFb <sup>d</sup> |         |        |      |       |         |        |      |         |         |         |      |         |         |         |  |
| CTRL              | 1205.57 | 227.96 | 0.99 | 0.80  | 1069.70 | 208.74 | 1.00 | 0.59    | 719.08  | 92.00   | 0.92 | 0.12    | 0.73    | 0.33    |  |
| TNF $\alpha$      | 1219.55 | 240.25 | REF  | REF   | 1074.19 | 168.30 | REF  | REF     | 785.48  | 118.41  | REF  | REF     | REF     | REF     |  |
| SPL+TNF $\alpha$  | 1196.66 | 214.71 | 0.98 | 0.86  | 1020.05 | 166.96 | 0.95 | 0.17    | 747.80  | 127.04  | 0.95 | 0.24    | 0.75    | 0.19    |  |
| EPL+TNF $\alpha$  | 1240.64 | 258.33 | 1.02 | 0.71  | 1091.26 | 221.90 | 1.02 | 0.82    | 798.56  | 121.41  | 1.02 | 0.76    | 0.96    | 0.86    |  |
| G-CSF             |         |        |      |       |         |        |      |         |         |         |      |         |         |         |  |
| CTRL              | 28.77   | 11.98  | 0.38 | 0.001 | 28.80   | 14.95  | 0.33 | 0.0002  | 40.39   | 27.07   | 0.02 | <0.0001 | <0.0001 | NA      |  |
| TNF $\alpha$      | 74.79   | 14.69  | REF  | REF   | 87.39   | 16.39  | REF  | REF     | 1757.41 | 1114.60 | REF  | REF     | REF     | REF     |  |
| SPL+TNF $\alpha$  | 53.49   | 12.38  | 0.72 | 0.15  | 47.65   | 13.01  | 0.55 | 0.02    | 555.01  | 270.16  | 0.32 | 0.01    | 0.26    | 0.0004  |  |
| EPL+TNF $\alpha$  | 72.00   | 12.87  | 0.96 | 0.89  | 82.83   | 21.15  | 0.95 | 0.70    | 1891.70 | 1376.12 | 1.08 | 0.63    | 0.97    | 0.61    |  |
| GM-CSF            |         |        |      |       |         |        |      |         |         |         |      |         |         |         |  |
| CTRL              | 716.61  | 31.05  | 0.95 | 0.13  | 724.38  | 10.79  | 0.96 | 0.34    | 694.63  | 44.84   | 0.85 | 0.003   | 0.10    | 0.01    |  |
| TNF $\alpha$      | 755.62  | 11.91  | REF  | REF   | 752.81  | 27.91  | REF  | REF     | 815.31  | 22.75   | REF  | REF     | REF     | REF     |  |
| SPL+TNF $\alpha$  | 757.46  | 19.16  | 1.00 | 0.96  | 716.78  | 31.26  | 0.95 | 0.20    | 728.84  | 20.34   | 0.89 | 0.02    | 0.11    | 0.03    |  |
| EPL+TNF $\alpha$  | 790.13  | 32.74  | 1.05 | 0.24  | 737.65  | 18.80  | 0.98 | 0.61    | 816.51  | 29.08   | 1.00 | 0.99    | 0.63    | 0.76    |  |



|                |                  |         |         |       |         |          |         |       |         |          |          |       |         |         |         |
|----------------|------------------|---------|---------|-------|---------|----------|---------|-------|---------|----------|----------|-------|---------|---------|---------|
| IFN $\gamma$   | CTRL             | 64.68   | 7.18    | 0.28  | 0.002   | 57.16    | 7.45    | 0.24  | 0.001   | 53.59    | 13.70    | 0.13  | 0.0001  | 0.14    | <0.0001 |
|                | TNF $\alpha$     | 229.84  | 52.95   | REF   | REF     | 234.34   | 53.27   | REF   | REF     | 397.93   | 30.08    | REF   | REF     | REF     | REF     |
|                | SPL+TNF $\alpha$ | 233.65  | 13.62   | 1.02  | 0.61    | 160.34   | 29.40   | 0.68  | 0.28    | 212.73   | 47.22    | 0.53  | 0.06    | 0.08    | NA      |
|                | EPL+TNF $\alpha$ | 264.94  | 38.04   | 11.15 | 0.39    | 261.41   | 41.52   | 1.12  | 0.49    | 350.16   | 46.80    | 0.88  | 0.68    | 0.38    | 0.43    |
| IP10           | CTRL             | 69.90   | 5.63    | 0.51  | <0.0001 | 68.60    | 8.34    | 0.04  | <0.0001 | 65.44    | 9.83     | 0.01  | <0.0001 | <0.0001 | NA      |
|                | TNF $\alpha$     | 137.32  | 20.72   | REF   | REF     | 1865.45  | 377.86  | REF   | REF     | 12384.92 | 1950.15  | REF   | REF     | REF     | REF     |
|                | SPL+TNF $\alpha$ | 85.20   | 12.89   | 0.62  | 0.001   | 472.83   | 225.60  | 0.25  | 0.001   | 4530.69  | 1144.79  | 0.37  | 0.003   | 0.07    | NA      |
|                | EPL+TNF $\alpha$ | 148.63  | 23.14   | 1.08  | 0.45    | 1996.88  | 525.81  | 1.07  | 0.93    | 12145.34 | 1908.05  | 0.98  | 0.95    | 0.92    | 0.73    |
| CCL2           | CTRL             | 832.88  | 365.41  | 0.18  | 0.0002  | 1019.47  | 454.94  | 0.07  | <0.0001 | 1787.36  | 621.41   | 0.03  | 0.0002  | 0.19    | <0.0001 |
|                | TNF $\alpha$     | 4596.48 | 819.33  | REF   | REF     | 14682.95 | 2223.30 | REF   | REF     | 69623.19 | 44386.31 | REF   | REF     | REF     | REF     |
|                | SPL+TNF $\alpha$ | 1882.95 | 352.34  | 0.41  | 0.03    | 3795.07  | 348.48  | 0.26  | 0.002   | 17998.26 | 1315.41  | 0.26  | 0.15    | 0.60    | 0.0001  |
|                | EPL+TNF $\alpha$ | 4640.03 | 763.54  | 1.01  | 0.96    | 15229.13 | 2739.96 | 1.04  | 0.95    | 62067.90 | 36854.18 | 0.89  | 0.94    | 0.99    | 1.00    |
| MIP1 $\alpha$  | CTRL             | 2.66    | 0.93    | 0.61  | 0.01    | 2.33     | 0.98    | 0.55  | 0.004   | 2.44     | 0.98     | 0.47  | 0.01    | 0.61    | <0.0001 |
|                | TNF $\alpha$     | 4.38    | 0.48    | REF   | REF     | 4.20     | 0.58    | REF   | REF     | 5.24     | 0.61     | REF   | REF     | REF     | REF     |
|                | SPL+TNF $\alpha$ | 3.96    | 0.66    | 0.90  | 0.54    | 3.06     | 0.92    | 0.73  | 0.07    | 4.29     | 0.67     | 0.82  | 0.51    | 0.33    | 0.01    |
|                | EPL+TNF $\alpha$ | 4.45    | 0.48    | 1.02  | 0.93    | 4.28     | 0.61    | 1.02  | 0.97    | 5.20     | 0.60     | 0.99  | 0.99    | 0.98    | 0.88    |
| MIP1 $\beta$   | CTRL             | 9.90    | 2.68    | 0.82  | 0.22    | 8.91     | 2.07    | 0.85  | 0.44    | 8.41     | 2.73     | 0.62  | 0.08    | 0.45    | 0.05    |
|                | TNF $\alpha$     | 12.10   | 3.38    | REF   | REF     | 10.45    | 2.79    | REF   | REF     | 13.64    | 4.61     | REF   | REF     | REF     | REF     |
|                | SPL+TNF $\alpha$ | 10.53   | 2.88    | 0.87  | 0.31    | 8.18     | 2.30    | 0.78  | 0.09    | 10.41    | 3.59     | 0.76  | 0.28    | 0.77    | 0.02    |
|                | EPL+TNF $\alpha$ | 12.74   | 3.63    | 1.05  | 0.71    | 11.00    | 3.63    | 1.05  | 0.88    | 12.93    | 4.22     | 0.95  | 0.87    | 0.90    | 0.94    |
| PDGFbb         | CTRL             | 11.06   | 0.62    | 0.62  | 0.001   | 13.65    | 2.84    | 0.63  | 0.0001  | 32.65    | 7.73     | 0.40  | <0.0001 | 0.18    | <0.0001 |
|                | TNF $\alpha$     | 17.72   | 2.45    | REF   | REF     | 21.62    | 3.16    | REF   | REF     | 80.97    | 26.30    | REF   | REF     | REF     | REF     |
|                | SPL+TNF $\alpha$ | 16.17   | 2.35    | 0.91  | 0.33    | 16.65    | 2.77    | 0.77  | 0.01    | 76.57    | 26.69    | 0.95  | 0.30    | 0.62    | 0.10    |
|                | EPL+TNF $\alpha$ | 19.67   | 3.13    | 1.11  | 0.30    | 22.86    | 4.82    | 1.06  | 0.82    | 85.73    | 26.84    | 1.06  | 0.39    | 0.92    | 0.42    |
| RANTES         | CTRL             | 40.32   | 7.03    | 0.44  | 0.001   | 39.30    | 9.67    | 0.08  | <0.0001 | 35.46    | 9.61     | 0.01  | <0.0001 | <0.0001 | NA      |
|                | TNF $\alpha$     | 91.73   | 28.00   | REF   | REF     | 500.84   | 182.77  | REF   | REF     | 6879.69  | 3357.09  | REF   | REF     | REF     | REF     |
|                | SPL+TNF $\alpha$ | 73.59   | 20.04   | 0.80  | 0.28    | 311.81   | 89.59   | 0.62  | 0.21    | 3908.36  | 1419.16  | 0.57  | 0.19    | 0.59    | 0.003   |
|                | EPL+TNF $\alpha$ | 98.37   | 33.34   | 1.07  | 0.77    | 502.74   | 173.40  | 1.00  | 0.96    | 5959.01  | 2649.30  | 0.87  | 0.73    | 0.75    | 0.88    |
| TNF $\alpha^e$ | CTRL             | 11.40   | 1.81    | 0.002 | <0.0001 | 10.36    | 1.86    | 0.003 | <0.0001 | 11.85    | 2.89     | 0.007 | <0.0001 | 0.01    | NA      |
|                | TNF $\alpha$     | 5013.60 | 453.62  | REF   | REF     | 3958.44  | 150.66  | REF   | REF     | 1677.93  | 293.84   | REF   | REF     | REF     | REF     |
|                | SPL+TNF $\alpha$ | 5559.33 | 1059.77 | 1.11  | 0.75    | 2955.32  | 226.14  | 0.75  | 0.09    | 1161.16  | 51.73    | 0.69  | 0.28    | 0.19    | 0.07    |
|                | EPL+TNF $\alpha$ | 5674.67 | 172.45  | 1.13  | 0.52    | 4403.51  | 724.84  | 1.11  | 0.65    | 1378.20  | 64.04    | 0.82  | 0.59    | 0.33    | 0.84    |

|                   |         |        |      |      |         |        |      |      |        |        |      |       |      |      |  |
|-------------------|---------|--------|------|------|---------|--------|------|------|--------|--------|------|-------|------|------|--|
| VEGF <sup>d</sup> |         |        |      |      |         |        |      |      |        |        |      |       |      |      |  |
| CTRL              | 1525.44 | 688.23 | 0.98 | 0.48 | 1158.37 | 487.95 | 0.96 | 0.04 | 415.64 | 73.01  | 0.64 | 0.001 | 0.16 | 0.06 |  |
| TNF $\alpha$      | 1562.84 | 703.80 | REF  | REF  | 1205.81 | 449.82 | REF  | REF  | 644.60 | 163.15 | REF  | REF   | REF  | REF  |  |
| SPL+TNF $\alpha$  | 1543.54 | 712.35 | 0.99 | 0.46 | 1209.84 | 479.15 | 1.00 | 0.64 | 717.64 | 232.05 | 1.11 | 0.46  | 0.79 | 0.91 |  |
| EPL+TNF $\alpha$  | 1639.60 | 777.17 | 1.05 | 0.52 | 1271.68 | 521.72 | 1.05 | 0.59 | 656.60 | 158.76 | 1.02 | 0.75  | 1.00 | 0.73 |  |

Abbreviations: REF, reference for fold change comparison; NA, not applicable

<sup>a</sup>Fold change relative to TNF $\alpha$  stimulation

<sup>b</sup>P-values were calculated based on log<sub>10</sub> transformed concentrations

<sup>c</sup>Main effect p-values are reported when the p-value for the interaction between treatment and time is > 0.10

<sup>d</sup>Component of cell culture media

<sup>e</sup>Used to stimulate cells

Table S4. Patient Characteristics

|                                                       | No SPL<br>(N=36) | SPL<br>(N=17) | P-value |
|-------------------------------------------------------|------------------|---------------|---------|
| Mean age, years (SD)                                  | 52 (15)          | 50 (12)       | 0.71    |
| Gender, % Female (n)                                  | 92 (33)          | 94 (16)       | 1.00    |
| Race, % Caucasian (n)                                 | 72 (26)          | 71 (12)       | 1.00    |
| Body mass index > 30, % (n)                           | 31 (11)          | 71 (12)       | 0.006   |
| Diagnosis, % (n)                                      |                  |               | 0.20    |
| Idiopathic or hereditary PAH                          | 50 (18)          | 41 (7)        |         |
| Systemic Sclerosis associated PAH                     | 22 (8)           | 18 (3)        |         |
| Connective tissue disease-associated PAH <sup>a</sup> | 6 (2)            | 29 (5)        |         |
| Congenital heart disease-associated PAH               | 14 (5)           | 12 (2)        |         |
| Other associated PAH <sup>b</sup>                     | 8 (3)            | 0 (0)         |         |
| NYHA/WHO functional class, % (n)                      |                  |               | 1.00    |
| I                                                     | 11 (4)           | 12 (2)        |         |
| II                                                    | 53 (19)          | 53 (9)        |         |
| III                                                   | 31 (11)          | 35 (6)        |         |
| IV                                                    | 6 (2)            | 0 (0)         |         |
| Use of phosphodiesterase 5 inhibitors, % (n)          | 83 (30)          | 94 (16)       | 0.41    |
| Use of endothelin receptor antagonists, % (n)         | 25 (9)           | 47 (8)        | 0.11    |
| Use of a continuous prostacyclin infusion, % (n)      | 31 (11)          | 59 (10)       | 0.05    |
| Use of warfarin, % (n)                                | 19 (7)           | 6 (1)         | 0.41    |
| Use of immunomodulatory therapy <sup>c</sup> , % (n)  | 3 (1)            | 24 (4)        | 0.03    |
| Mean 6-minute walk distance, m (SD)                   | 426 (129)        | 414 (109)     | 0.75    |
| Mean 6-minute walk distance, % predicted (SD)         | 79 (23)          | 79 (22)       | 0.99    |
| Mean daily dose of spironolactone, mg (SD)            | -----            | 66 (34)       |         |

Abbreviations: SPL, spironolactone; PAH, pulmonary arterial hypertension; NYHA/WHO, New York Heart Association/World Health Organization.

<sup>a</sup>In No SPL group, one patient with connective tissue disease also had portal hypertension.

<sup>b</sup>In No SPL group, drug-induced PAH (n=1), portal hypertension associated PAH (n=1) and hereditary hemorrhagic telangiectasia associated PAH (n=1).

<sup>c</sup>In No SPL group, one patient was taking hydroxychloroquine; in SPL group, all four patients were taking hydroxychloroquine

Table S5. Multivariate Analysis of Inflammatory Mediators in PAH Patients

|                                                 | Eotaxin  |      |         | FGFb     |      |         | GM-CSF   |      |         | G-CSF    |      |         |
|-------------------------------------------------|----------|------|---------|----------|------|---------|----------|------|---------|----------|------|---------|
|                                                 | Estimate | SE   | P-value |
| Obesity (BMI $\geq$ 30)                         | -0.018   | 0.10 | 0.85    | 0.087    | 0.10 | 0.36    | 0.23     | 0.10 | 0.017   | 0.20     | 0.10 | 0.034   |
| Etiology of PAH                                 |          |      |         |          |      |         |          |      |         |          |      |         |
| IPAH/HPAH vs. other associated PAH <sup>d</sup> | 0.11     | 0.12 | 0.34    | 0.19     | 0.12 | 0.11    | 0.18     | 0.12 | 0.14    | 0.11     | 0.12 | 0.35    |
| CTD PAH vs. other associated PAH <sup>d</sup>   | 0.25     | 0.13 | 0.05    | 0.20     | 0.13 | 0.13    | 0.28     | 0.13 | 0.032   | 0.070    | 0.13 | 0.59    |
| Endothelin-1 receptor antagonists               | 0.078    | 0.11 | 0.46    | 0.0061   | 0.11 | 0.95    | 0.12     | 0.11 | 0.28    | 0.20     | 0.11 | 0.056   |
| Phosphodiesterase 5 inhibitors                  | 0.036    | 0.13 | 0.78    | -0.0070  | 0.13 | 0.96    | -0.085   | 0.13 | 0.50    | -0.13    | 0.13 | 0.32    |
| Prostacyclin infusions                          | 0.045    | 0.10 | 0.66    | -0.054   | 0.10 | 0.59    | -0.056   | 0.10 | 0.58    | 0.019    | 0.10 | 0.85    |
| Spirolactone                                    | -0.074   | 0.11 | 0.51    | -0.073   | 0.11 | 0.52    | -0.26    | 0.11 | 0.021   | -0.19    | 0.11 | 0.094   |
| Immunomodulatory therapy <sup>b</sup>           | 0.10     | 0.17 | 0.53    | 0.061    | 0.17 | 0.71    | 0.17     | 0.17 | 0.31    | 0.29     | 0.17 | 0.076   |

|                                                 | IFN $\gamma$ |      |         | IL10     |      |         | IL12p70  |      |         | IL13     |      |         |
|-------------------------------------------------|--------------|------|---------|----------|------|---------|----------|------|---------|----------|------|---------|
|                                                 | Estimate     | SE   | P-value | Estimate | SE   | P-value | Estimate | SE   | P-value | Estimate | SE   | P-value |
| Obesity (BMI $\geq$ 30)                         | 0.10         | 0.10 | 0.28    | 0.12     | 0.10 | 0.21    | 0.039    | 0.10 | 0.68    | 0.027    | 0.10 | 0.77    |
| Etiology of PAH                                 |              |      |         |          |      |         |          |      |         |          |      |         |
| IPAH/HPAH vs. other associated PAH <sup>d</sup> | 0.12         | 0.12 | 0.30    | 0.20     | 0.12 | 0.090   | 0.19     | 0.12 | 0.12    | 0.17     | 0.12 | 0.15    |
| CTD PAH vs. other associated PAH <sup>d</sup>   | 0.18         | 0.13 | 0.17    | 0.23     | 0.13 | 0.076   | 0.24     | 0.13 | 0.067   | 0.17     | 0.13 | 0.18    |
| Endothelin-1 receptor antagonists               | -0.018       | 0.11 | 0.86    | 0.15     | 0.11 | 0.15    | 0.046    | 0.11 | 0.66    | 0.034    | 0.11 | 0.75    |
| Phosphodiesterase 5 inhibitors                  | -0.024       | 0.13 | 0.85    | -0.10    | 0.13 | 0.45    | -0.16    | 0.13 | 0.21    | -0.026   | 0.13 | 0.84    |
| Prostacyclin infusions                          | -0.043       | 0.10 | 0.68    | 0.25     | 0.10 | 0.015   | 0.27     | 0.10 | 0.0091  | 0.075    | 0.10 | 0.46    |
| Spirolactone                                    | 0.0013       | 0.11 | 0.99    | -0.25    | 0.11 | 0.028   | -0.14    | 0.11 | 0.23    | -0.064   | 0.11 | 0.57    |
| Immunomodulatory therapy <sup>b</sup>           | 0.013        | 0.17 | 0.94    | 0.22     | 0.17 | 0.19    | 0.061    | 0.17 | 0.71    | 0.079    | 0.17 | 0.63    |

|                                                 | IL17     |      |         | IL1ra    |      |         | IL2      |      |         | IL4      |      |         |
|-------------------------------------------------|----------|------|---------|----------|------|---------|----------|------|---------|----------|------|---------|
|                                                 | Estimate | SE   | P-value |
| Obesity (BMI $\geq$ 30)                         | 0.17     | 0.10 | 0.072   | 0.11     | 0.10 | 0.26    | 0.18     | 0.10 | 0.060   | 0.037    | 0.10 | 0.70    |
| Etiology of PAH                                 |          |      |         |          |      |         |          |      |         |          |      |         |
| IPAH/HPAH vs. other associated PAH <sup>d</sup> | 0.21     | 0.12 | 0.076   | 0.20     | 0.12 | 0.090   | 0.24     | 0.12 | 0.042   | 0.094    | 0.12 | 0.43    |
| CTD PAH vs. other associated PAH <sup>d</sup>   | 0.24     | 0.13 | 0.069   | 0.27     | 0.13 | 0.040   | 0.30     | 0.13 | 0.020   | 0.087    | 0.13 | 0.50    |
| Endothelin-1 receptor antagonists               | 0.10     | 0.11 | 0.36    | 0.18     | 0.11 | 0.085   | 0.14     | 0.11 | 0.18    | 0.014    | 0.11 | 0.90    |
| Phosphodiesterase 5 inhibitors                  | -0.019   | 0.13 | 0.88    | 0.022    | 0.13 | 0.86    | 0.025    | 0.13 | 0.84    | -0.053   | 0.13 | 0.68    |
| Prostacyclin infusions                          | -0.12    | 0.10 | 0.25    | 0.14     | 0.10 | 0.18    | -0.054   | 0.10 | 0.59    | -0.031   | 0.10 | 0.76    |
| Spirolactone                                    | -0.20    | 0.11 | 0.083   | -0.17    | 0.11 | 0.13    | -0.15    | 0.11 | 0.19    | -0.044   | 0.11 | 0.70    |
| Immunomodulatory therapy <sup>b</sup>           | 0.14     | 0.17 | 0.39    | 0.24     | 0.17 | 0.14    | 0.20     | 0.17 | 0.23    | 0.039    | 0.17 | 0.81    |

|                                                 | IL6      |      |         | IL7      |      |         | IL8      |      |         | IL9      |      |         |
|-------------------------------------------------|----------|------|---------|----------|------|---------|----------|------|---------|----------|------|---------|
|                                                 | Estimate | SE   | P-value |
| Obesity (BMI $\geq$ 30)                         | 0.10     | 0.10 | 0.28    | 0.21     | 0.10 | 0.029   | 0.12     | 0.10 | 0.20    | 0.20     | 0.10 | 0.035   |
| Etiology of PAH                                 |          |      |         |          |      |         |          |      |         |          |      |         |
| IPAH/HPAH vs. other associated PAH <sup>a</sup> | 0.18     | 0.12 | 0.14    | 0.31     | 0.12 | 0.0095  | 0.24     | 0.12 | 0.046   | 0.25     | 0.12 | 0.038   |
| CTD PAH vs. other associated PAH <sup>a</sup>   | 0.28     | 0.13 | 0.031   | 0.28     | 0.13 | 0.032   | 0.18     | 0.13 | 0.17    | 0.36     | 0.13 | 0.0051  |
| Endothelin-1 receptor antagonists               | 0.085    | 0.11 | 0.42    | 0.10     | 0.11 | 0.34    | 0.069    | 0.11 | 0.51    | 0.18     | 0.11 | 0.094   |
| Phosphodiesterase 5 inhibitors                  | -0.0088  | 0.13 | 0.94    | -0.10    | 0.13 | 0.44    | -0.077   | 0.13 | 0.55    | 0.011    | 0.13 | 0.93    |
| Prostacyclin infusions                          | -0.0078  | 0.10 | 0.94    | 0.22     | 0.10 | 0.028   | -0.075   | 0.10 | 0.46    | -0.032   | 0.10 | 0.76    |
| Spironolactone                                  | -0.11    | 0.11 | 0.33    | -0.28    | 0.11 | 0.015   | -0.15    | 0.11 | 0.19    | -0.31    | 0.11 | 0.0072  |
| Immunomodulatory therapy <sup>b</sup>           | 0.072    | 0.17 | 0.66    | 0.033    | 0.17 | 0.84    | 0.17     | 0.17 | 0.32    | 0.17     | 0.17 | 0.31    |

|                                                 | IP10     |      |         | CCL2     |      |         | MIP1 $\alpha$ |      |         | MIP1 $\beta$ |      |         |
|-------------------------------------------------|----------|------|---------|----------|------|---------|---------------|------|---------|--------------|------|---------|
|                                                 | Estimate | SE   | P-value | Estimate | SE   | P-value | Estimate      | SE   | P-value | Estimate     | SE   | P-value |
| Obesity (BMI $\geq$ 30)                         | 0.087    | 0.10 | 0.36    | 0.13     | 0.10 | 0.18    | 0.11          | 0.10 | 0.26    | 0.084        | 0.10 | 0.38    |
| Etiology of PAH                                 |          |      |         |          |      |         |               |      |         |              |      |         |
| IPAH/HPAH vs. other associated PAH <sup>a</sup> | -0.0085  | 0.12 | 0.94    | -0.021   | 0.12 | 0.86    | 0.21          | 0.12 | 0.076   | 0.0025       | 0.12 | 0.98    |
| CTD PAH vs. other associated PAH <sup>a</sup>   | 0.25     | 0.13 | 0.050   | 0.10     | 0.13 | 0.43    | 0.19          | 0.13 | 0.14    | 0.080        | 0.13 | 0.54    |
| Endothelin-1 receptor antagonists               | 0.10     | 0.11 | 0.34    | 0.13     | 0.11 | 0.24    | 0.026         | 0.11 | 0.80    | 0.034        | 0.11 | 0.75    |
| Phosphodiesterase 5 inhibitors                  | -0.017   | 0.13 | 0.89    | -0.032   | 0.13 | 0.80    | -0.0066       | 0.13 | 0.96    | -0.15        | 0.13 | 0.25    |
| Prostacyclin infusions                          | -0.038   | 0.10 | 0.71    | 0.082    | 0.10 | 0.42    | -0.13         | 0.10 | 0.20    | 0.079        | 0.10 | 0.44    |
| Spironolactone                                  | -0.11    | 0.11 | 0.34    | -0.18    | 0.11 | 0.12    | -0.080        | 0.11 | 0.48    | -0.15        | 0.11 | 0.20    |
| Immunomodulatory therapy <sup>b</sup>           | -0.12    | 0.17 | 0.45    | 0.068    | 0.17 | 0.68    | 0.077         | 0.17 | 0.64    | -0.088       | 0.17 | 0.59    |

|                                                 | PDGFbb   |      |         | RANTES   |      |         | TNF $\alpha$ |      |         | VEGF     |      |         |
|-------------------------------------------------|----------|------|---------|----------|------|---------|--------------|------|---------|----------|------|---------|
|                                                 | Estimate | SE   | P-value | Estimate | SE   | P-value | Estimate     | SE   | P-value | Estimate | SE   | P-value |
| Obesity (BMI $\geq$ 30)                         | 0.11     | 0.10 | 0.27    | 0.14     | 0.10 | 0.15    | 0.11         | 0.10 | 0.25    | 0.063    | 0.10 | 0.51    |
| Etiology of PAH                                 |          |      |         |          |      |         |              |      |         |          |      |         |
| IPAH/HPAH vs. other associated PAH <sup>a</sup> | 0.20     | 0.12 | 0.10    | 0.16     | 0.12 | 0.18    | 0.22         | 0.12 | 0.071   | 0.19     | 0.12 | 0.12    |
| CTD PAH vs. other associated PAH <sup>a</sup>   | 0.15     | 0.13 | 0.26    | 0.29     | 0.13 | 0.026   | 0.28         | 0.13 | 0.028   | 0.14     | 0.13 | 0.29    |
| Endothelin-1 receptor antagonists               | 0.14     | 0.11 | 0.19    | 0.21     | 0.11 | 0.049   | 0.12         | 0.11 | 0.28    | 0.019    | 0.11 | 0.86    |
| Phosphodiesterase 5 inhibitors                  | -0.085   | 0.13 | 0.50    | -0.038   | 0.13 | 0.77    | -0.0082      | 0.13 | 0.95    | -0.14    | 0.13 | 0.28    |
| Prostacyclin infusions                          | 0.015    | 0.10 | 0.88    | -0.087   | 0.10 | 0.39    | 0.033        | 0.10 | 0.75    | 0.29     | 0.10 | 0.0050  |
| Spironolactone                                  | -0.22    | 0.11 | 0.049   | -0.19    | 0.11 | 0.10    | -0.16        | 0.11 | 0.16    | -0.077   | 0.11 | 0.50    |
| Immunomodulatory therapy <sup>b</sup>           | -0.11    | 0.17 | 0.53    | 0.081    | 0.17 | 0.63    | 0.13         | 0.17 | 0.42    | 0.12     | 0.17 | 0.47    |

<sup>a</sup>Congenital heart disease associated PAH (n=7), drug-induced PAH (n=1), portal hypertension associated PAH (n=1) and hereditary hemorrhagic telangiectasia associated PAH (n=1)

<sup>b</sup>All 5 patients were treated with hydroxychloroquine monotherapy

Table S6. Sequences for SYBR Green primers of target genes used in quantitative real-time PCR

| <b>Gene Symbol</b> | <b>Gene Name</b>                                                                    | <b>Forward</b>                | <b>Reverse</b>                |
|--------------------|-------------------------------------------------------------------------------------|-------------------------------|-------------------------------|
| <i>ACTB</i>        | $\beta$ -Actin                                                                      | 5'-CCGCCGCCAGCTCACCAT-3'      | 5'-ACCCATGCCACCACATCACGC-3'   |
| <i>CCL2</i>        | Chemokine (C-C motif) ligand 2                                                      | 5'-CGCCTCCAGCATGAAAAGTCT-3'   | 5'-ATGAAGGTGGCTGCTATGAGC-3'   |
| <i>PTGS2</i>       | Prostaglandin-endoperoxide synthase 2                                               | 5'-TGAATCATTCACCAGGCAAAT-3'   | 5'-TCTGTACTGCGGGTGAACA-3'     |
| <i>ERCC3</i>       | Excision repair cross-complementation group 3                                       | 5'-GCCATTCGACTGAACAAACCC-3'   | 5'-TCCGGCAGATCAAACGAAGT-3'    |
| <i>IL8</i>         | Interleukin 8                                                                       | 5'-TGCAGCTCTGTGTGAAGGTGCAG-3' | 5'-TGTGTTGGCGCAGTGTGGTCC-3'   |
| <i>IL6</i>         | Interleukin 6                                                                       | 5'-CCAGGAGCCCAGCTATGAAC-3'    | 5'-CCCAGGGAGAAGGCAACTG-3'     |
| <i>INHBA</i>       | Inhibin beta A subunit                                                              | 5'-TTGCCGAGTCAGGAACAGC-3'     | 5'-GGGACTTTTAGGAAGAGCCAGAC-3' |
| <i>luc2P</i>       | Luciferase reporter gene                                                            | 5'-GCTCAGCAAGGAGGTAGGTG-3'    | 5'-TGATCAGAATGGCGCTGGTT-3'    |
| <i>NFKBIA</i>      | Nuclear factor of kappa light polypeptide gene enhancer in B-cells inhibitor, alpha | 5'-AGCTCCGAGACTTTCGAGGA-3'    | 5'-CACGTGTGGCCATTGTAGTTG-3'   |
